# Supplementary material for: Gastric residual volume measurement in British neonatal intensive care units: a survey of practice
Source: PubMed Central journal article supplement (PMC7418677; doi:10.1136/bmjpo-2019-000601), 2020-08-07
Supplement: bmjpo-2019-000601supp001.pdf [file bmjpo-2019-000601supp001.pdf]

## Introduction

We want to find out how Gastric Residual Volumes (GRV) are measured and used in your NICU. GRV measurement is aspirating ALL of the stomach contents to measure a 'volume' or 'aspirate' and often to look at the colour. This is NOT the small amount that is aspirated to test pH to confirm tube position.

We recommend a senior clinical nurse (who still does clinical practice) along with a senior doctor and/or a dietitian sit down together to complete this survey and we would like just one survey returned per NICU. If this is not possible, please respond without such a meeting.

Which neonatal unit do you work at?

Is the unit?

- NICU surgical and medical
- NICU medical only
- LNU
- SCBU

What are the job positions of the people completing this survey?

- Senior Doctor (Consultant)
- Middle Grade Doctor (SpR)
- Junior Grade Doctor (SHO)
- Nurse
- Dietitian

What band of nurse are you?

---

What band of dietitian are you?

---

Does your unit have written feeding guidelines/ protocol for medical and surgical babies?

- Yes
- No

We would greatly appreciate it if you would upload the feeding guidelines/protocol using the 'upload document' link below. Alternatively, they can be emailed to the GASTRIC study team at [gastric.study@liverpool.ac.uk](mailto:gastric.study@liverpool.ac.uk).

Are your standard NG feeds:

- Intermittent
- Continuous

Is there specific guidance about how Gastric Residual Volume should be measured and interpreted - for example a protocol or guideline?

- Yes
- No

We would greatly appreciate it if you would upload the guidelines/protocol using the 'upload document' link below. Alternatively, they can be emailed to the GASTRIC study team at [gastric.study@liverpool.ac.uk](mailto:gastric.study@liverpool.ac.uk).

Does Gastric Residual Volume measurement differ between the medical and surgical babies?

- Yes
- No

Please describe how it differs?

---

---

**The rest of the survey is now ONLY asking about the management of preterm and term medical babies - not surgical babies.**

How often do staff in your unit measure Gastric Residual Volume? (this question is NOT about aspirating a small amount to test pH, ONLY about how often you measure Gastric Residual Volume)

- Once a day
- Before every feed
- Only when clinically indicated
- Other

Please provide further details regarding how staff measure Gastric Residual Volume below; if 'other' has been selected, please also describe below:

Are Gastric Residual Volume measured for all babies, or just below a set gestational age/birth weight or for a specific condition?

Is the specific guidance for Gastric Residual Volume measurement followed and actually undertaken as per protocol? If needed, please ask a clinical member of your nursing team.

- Always
- Usually
- Often
- Rarely
- Never

Why is the guidance not always followed?

Who usually decides what to do with concerning Gastric Residual Volume aspirates in the first instance?

- Senior Doctor (Consultant)
- Middle Grade Doctor (SpR)
- Junior Grade Doctor (SHO)
- Bedside Nurse
- Nurse in charge of shift (senior nurse)

What band of nurse?

What would make a nurse seek advice from the medical team?

If you indicated that more than one person is involved in decision-making, please explain which factors may influence who makes the decision below:

How much does volume of the aspirate affect your decision around Gastric Residual Volume?

- 1 (Not at all)  2  3  
 4  5 (Very much)

Please specify how:

How much does colour of the aspirate affect your decision around Gastric Residual Volume?

- 1 (Not at all)  2  3  
 4  5 (Very much)

Please specify how:

What do you do with Gastric Residual Volume once obtained: return it or discard it?

- Return  
 Discard  
 Other

Please explain the factors that influence the decision to return or discard the Gastric Residual Volume. If 'other' selected, please also explain below:

---

---

Thank you for participating in the survey, your responses are greatly appreciated! If you have any further comments you wish to make, please provide below:

If you wish to be contacted about the study, please add your email address below (optional):

---
